# Supplementary material for: Bioactivity Study of the C60-L-Threonine Derivative for Potential Application in Agriculture
Source: Hindawi journal article supplement (doi:10.1155/2019/2306518), 2019-03-26
Supplement: f1 [file 2306518.f1.docx]

**Supplementary material**

**Bioactivity study of the C60-L-threonine derivative for potential application in agriculture**

Gayane G. Panovaa, Evgeny B. Serebryakovb, Konstantin N. Semenovb*, Nikolay A. Charykovc, Olga S. Shemchukb, Elena V. Andrusenkob, Elena V. Kanasha, Yuriy V. Khomyakova, Alexander M. Shpaneva, Larisa L. Dulnevad, Vladimir V. Sharoykob

aAgrophysical Research Institute, St. Petersburg, Russia, 195220, Grazhdansky pr. 14;

bSaint-Petersburg State University, St. Petersburg, Russia, 198504, Universitetskii pr. 26;

cSaint-Petersburg State Technological Institute (Technical University), St. Petersburg, Russia, 190013, Moskovskii pr., 26.,

dPavlov First Saint Petersburg State Medical University, St. Petersburg, Russia, 197022, L'va Tolstogo str. 6-8

**Table S1**

The effect of foliar plant treatment with C60-Thr solution and nanocomposition of C60-Thr with macro- and microelements, as well as L-threonine on the activity of the antioxidant system of spring barley *Hordeum vulgary L.* growing under controlled favorable conditions and under the influence of pesticides (*P*) imidacloprid (*P1*), carbendazim (*P2*) and glyphosate (*P3*). Sм – solution of macro – and microelements (Table 4); *Thr+* *Sм* - solutions of L-threonine (0.057 mg·l-1) and Sм; *C60-Thr + Sм*– solutions of C60-Thr (0.1 mg·l-1) and Sм; *Thr +Water* – water solution of L-threonine (0.057 mg·l-1); *C60-Thr +Water* - water solution of C60-Thr (0.1 mg·l-1)

| **Parameters** | **Pesticides** | **Experimental conditions of foliar plant treatment** | | | | | |
| --- | --- | --- | --- | --- | --- | --- | --- |
| Water | Sм | Thr+Sм | C60-Thr +Sм | Thr +Water | C60-Thr +Water |
| Lipid peroxidation, µM·g-1 | -P | 5.90 | 7.10* | 6.60 | 7.80* | 6.90* | 9.30* |
| + P1 | 7.40* | 9.60* | 8.40* | 6.30 | 7.20* | 7.80* |
| +P2 | 6.40 | 7.10* | 8.60* | 9.80* | 10.40* | 9.20* |
| +P3 | 5.50 | 5.20 | 5.00* | 4.40* | 4.40* | 3.00* |
| SOD, relative units | -P | 12.03 | 11.85 | 14.89* | 14.06* | 13.89* | 15.24* |
| + P1 | 10.35* | 10.19* | 13.78* | 15.85* | 11.91 | 22.50* |
| +P2 | 13.89* | 21.05* | 14.14* | 8.56* | 14.36* | 17.14* |
| +P3 | 25.95* | 25.32* | 24.55* | 28.57* | 24.19* | 24.34* |
| % to control | | | | | | | |
| Lipid peroxidation | -P | 100 | 120* | 112 | 132* | 117* | 158* |
| + P1 | 125* | 163* | 142* | 107 | 122* | 132* |
| +P2 | 109 | 120* | 146* | 166* | 176* | 156* |
| +P3 | 94 | 88 | 86* | 74* | 75* | 52* |
| SOD | -P | 100 | 99 | 124* | 117* | 116* | 127* |
| + P1 | 86* | 85* | 115* | 132* | 99 | 187* |
| +P2 | 116* | 175* | 118* | 71* | 119* | 143* |
|  | +P3 | 216* | 210* | 204* | 238* | 201* | 202* |

* *- p < 0.05 versus the corresponding value for control*

**Table S2**

The effect of foliar plant treatment with C60-Thr solution (0.1 mg·l-1) and nanocomposition of C60-Thr with macro- and microelements, as well as L-threonine on the grain productivity of spring barley *Hordeum vulgary L.* growing under controlled favorable conditions and under the influence of pesticides (P) imidacloprid (P1), carbendazim (P2) and glyphosate (P3). *Sм* – solution of macro – and microelements (Table 4); *Thr+Sм* - solutions of L-threonine (0.057 mg·l-1) and Sм; *C60-Thr + Sм*– solutions of C60-Thr (0.1 mg·l-1) and Sм; *Thr +Water* – water solution of L-threonine (0.057 mg·l-1); *C60-Thr +Water* - water solution of C60-Thr (0.1 mg·l-1)

| **Parameters** | **Pesticides** | **Experimental conditions of foliar plant treatment** | | | | | |
| --- | --- | --- | --- | --- | --- | --- | --- |
| Water | Sм | Thr+Sм | C60-Thr +Sм | Thr +Water | C60-Thr +Water |
| Seed weight, g/plant | -P | 1.39 | 1.47 | 1.25 | 1.51 | 1.37 | 1.77* |
| + P1 | 1.21* | 1.14* | 1.44 | 1.16 | 1.39 | 1.19 |
| +P2 | 1.30 | 0.95* | 0.90* | 0.97* | 1.09* | 0.90* |
| +P3 | 0.51* | 0.79* | 0.21* | 0.92* | 0.88* | 0.54* |
| Plant weight, g | -P | 4.82 | 5.32 | 4.87 | 5.31 | 4.82 | 6.38* |
| + P1 | 4.82 | 4.65 | 5.46 | 4.81 | 5.14 | 4.67 |
| +P2 | 4.88 | 4.25 | 4.47 | 4.38 | 4.56 | 4.15 |
| +P3 | 3.28* | 4.15* | 2.60* | 4.05* | 3.62* | 3.37* |
| **% to control** | | | | | | | |
| Seed weight,g | -P | 100 | 106 | 90 | 108* | 98 | 127* |
| + P1 | 87* | 82* | 103 | 83 | 100 | 86 |
| +P2 | 93 | 68* | 65* | 70* | 78* | 64* |
| +P3 | 37* | 57* | 15* | 66* | 63* | 39* |
| Plant weight, g | -P | 100 | 110 | 101 | 110 | 100 | 133* |
| + P1 | 100 | 97 | 113 | 100 | 107 | 97 |
| +P2 | 103 | 90 | 94 | 92 | 96 | 88 |
|  | +P3 | 68* | 86* | 54* | 84* | 75* | 70* |

**- p < 0.05 versus the corresponding value for control*

**Fig. S3.** The emission spectrum of C60 solution (C = 10-5 M) in *o*-xylene at a wavelength of 360 nm
